# Supplementary material
Source: Elsevier journal article supplement (https://www.sciencedirect.com/science/article/pii/S0120563319301974)
Supplement: mmc1 [file S0120563319301974:mmc1.docx]

ANEXO 1: **VARIABLES INCLUIDAS EN LA BASE DE DATOS (Anexo 1)**

1. Demográficos
   1. Género: Femenino / Masculino
   2. Edad
   3. Institución
   4. Fecha ingreso institución
   5. Hora Ingreso Institución
2. Enfermedades Crónicas (Reporte de condición como Si=1, No=0)
   1. Hipertensión arterial
   2. Enfermedad coronaria
   3. Dislipidemia
   4. Enfermedad Pulmonar Obstructiva Crónica
   5. Diabetes
   6. Insuficiencia Cardiaca
   7. Insuficiencia renal en hemodiálisis o sin hemodiálisis.
   8. Neoplasia
   9. Ingesta crónica de alcohol
3. Paciente con inestabilidad hemodinámica
   1. Si
   2. No
4. Requerimiento de cardioversión eléctrica
   1. Si
   2. No
5. Hallazgos en Electrocardiograma
   1. Ritmo
   2. Frecuencia cardiaca
   3. Cambios sugestivos de enfermedad coronaria activa (si / no)
6. Otros paraclínicos de ingreso positivos (Si/No)
   1. Troponina
   2. CK-MB
7. Clasificación fibrilación auricular
   1. Primer diagnostico, menor a 7 días
   2. Paroxística: Auto limitada, en la mayoría de los casos dentro de las 48 horas. Algunos paroxismos de la FA pueden continuar hasta 7 días. Los episodios de FA que se cardiovierten dentro de los 7 días deben considerarse paroxísticos
   3. Crónica: Fibrilación auricular de mas de 7 días, incluidos los episodios cardiovertidos farmacológicamente o eléctricamente de mas de 7 días de duración. Según la ultima clasificación de fibrilación auricular (Ver grafico 1) en este grupo se incluyeron pacientes con fibrilación auricular persistente, persistente de larga duración y permanente.
8. Riesgo de trombosis
   1. Puntaje de CHA2DS2-VASC
9. Realización de ecocardiograma
   1. Si
   2. No
10. Tratamiento de elección
    1. Control de Frecuencia
    2. Control del Ritmo
    3. Anticoagulación
11. Medicamento para control del ritmo
    1. Amiodarona
       1. Dosis Carga
       2. Dosis mantenimiento
    2. Flecainide
       1. Dosis en 24 horas
    3. Propafenone
       1. Dosis en 24 horas
    4. Ibutilide
       1. Dosis en 24 horas
    5. Vernakalant
       1. Dosis en 24 horas
12. Desenlaces en control del ritmo
    1. Tiempo para reversión
       1. Menor a 30 minutos
       2. 30 minutos a 6 horas
       3. 6 a 24 horas
       4. mas de 24 horas
    2. Requerimiento de anticoagulación
       1. Si
       2. No
13. Medicamento para control de la frecuencia
    1. Metoprolol
       1. Dosis en 24 horas
    2. Carvedilol
       1. Dosis en 24 horas
    3. Esmolol
       1. Dosis en 24 horas
    4. Nebivolol
       1. Dosis en 24 horas
    5. Propanolol
       1. Dosis en 24 horas
    6. Verapamilo
       1. Dosis en 24 horas
    7. Digoxina
       1. Dosis 24 horas
14. Desenlaces en control de la frecuencia
    1. Tiempo requerido para control
       1. Menor a 6 horas
       2. Mayor a 6 horas
    2. Requerimiento de anticoagulación
       1. Si
       2. No
15. Desenlaces generales
    1. Tiempo de estancia en urgencias
    2. Requerimiento de hospitalización
       1. UCI
       2. Cuidado coronario
       3. Cuidado intermedio
